# Supplementary material
Source: PubMed Central journal article supplement (PMC10165415)
Supplement: mmc1.pdf [file mmc1.pdf]

**Supplemental information**

**COVID-19 relapse associated with SARS-CoV-2**

**evasion from CD4<sup>+</sup> T-cell recognition**

**in an agammaglobulinemia patient**

**Ryo Morita, Ritsuko Kubota-Koketsu, Xiuyuan Lu, Tadahiro Sasaki, Emi E. Nakayama, Yu-chen Liu, Daisuke Okuzaki, Daisuke Motooka, James Badger Wing, Yasunori Fujikawa, Yuji Ichida, Kiyoko Amo, Tetsushi Goto, Junichi Hara, Michinori Shirano, Sho Yamasaki, and Tatsuo Shioda**

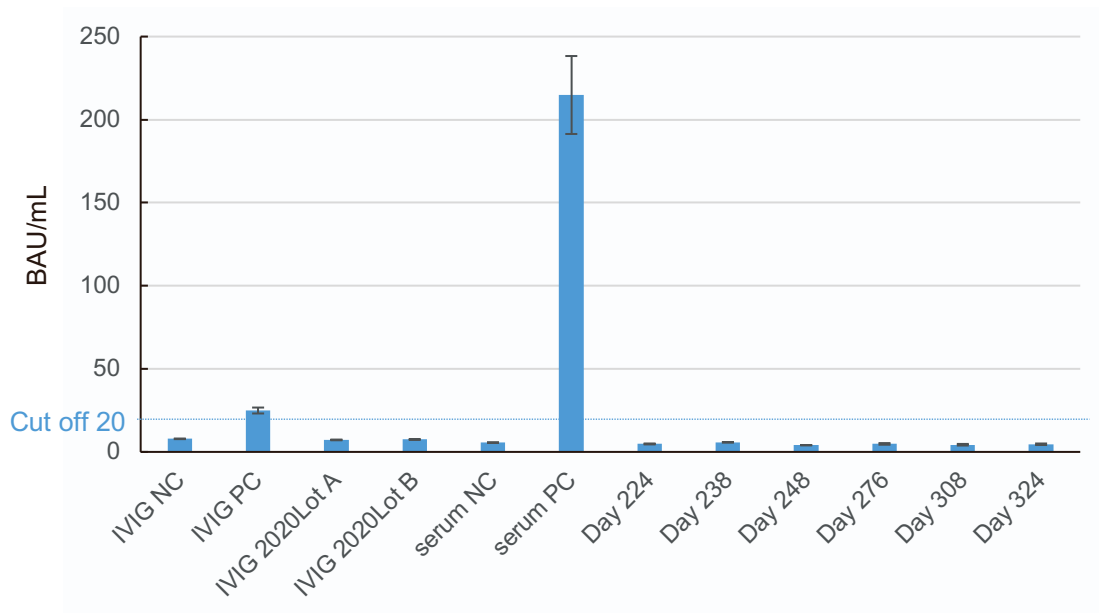

**Figure S1. The anti-SARS-CoV-2 spike (S) protein in the patient plasma (related to Figure 1).** Binding antibody titers against the SARS-CoV-2 S protein in the patient plasma and intravenous immunoglobulin (IVIG) lots administered to the patient during the study. BAU, binding antibody unit; NC, negative control; PC, positive control. Values over 20 BAU/mL were considered positive. Error bars indicate mean  $\pm$  SD of triplicate measurements.

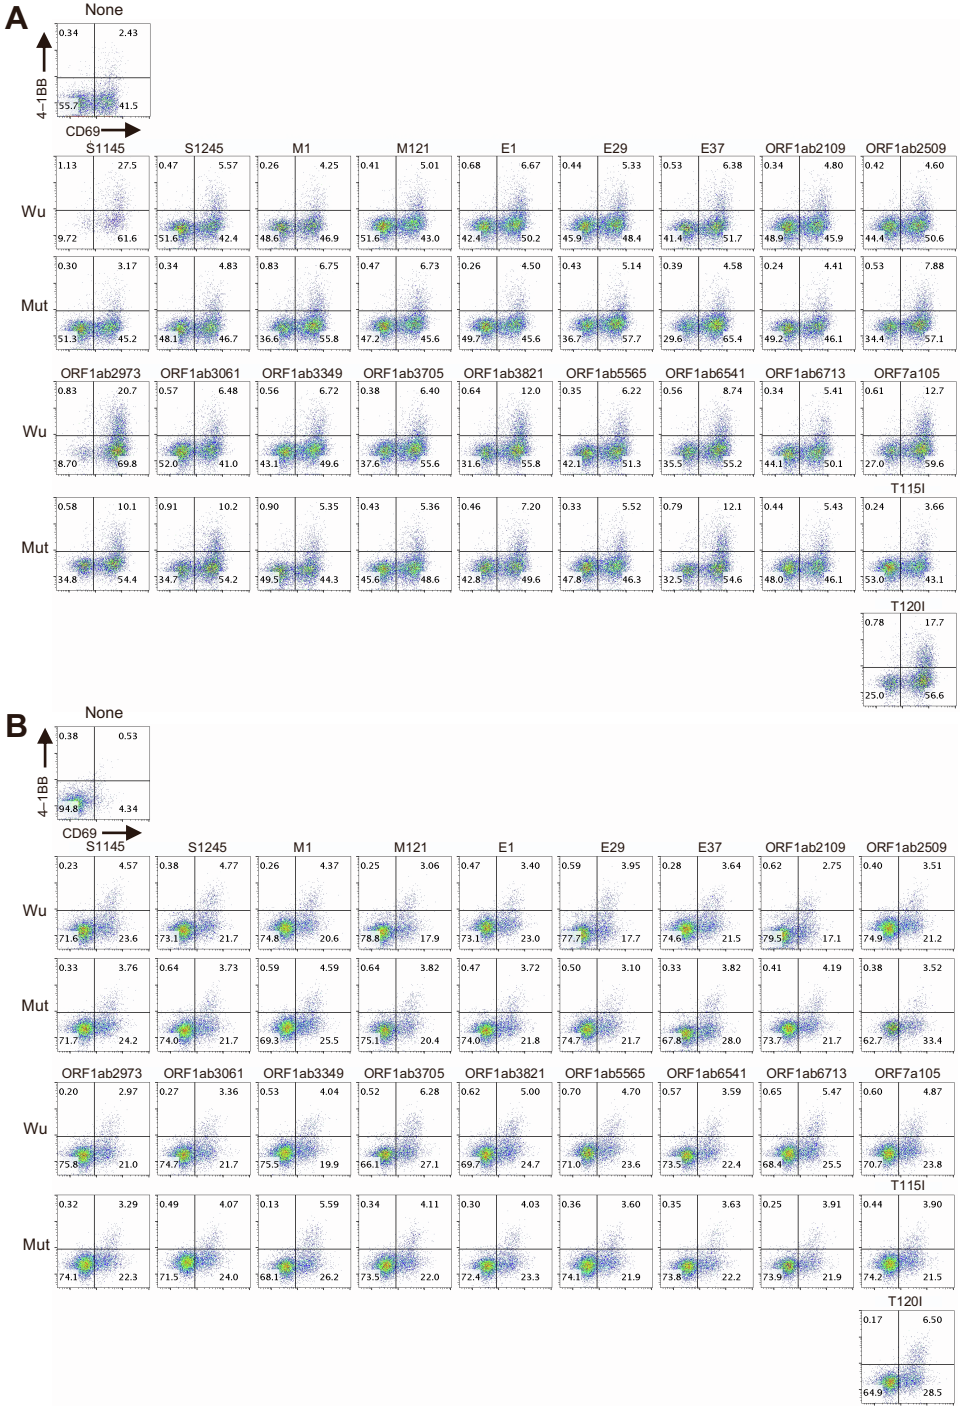

**Figure S2. Responses of CD4<sup>+</sup> and CD8<sup>+</sup> T cells to the Wuhan and mutant peptides of SARS-CoV-2 (related to Figure 3).**

PBMCs collected from the donor on day 308 were stimulated with 19 pooled Wuhan peptides that covered the mutations detected in the donor for 13 days. CD4<sup>+</sup> and CD8<sup>+</sup> T cells were then sorted separately and re-stimulated with nothing (None), individual Wuhan peptides (Wu), or corresponding mutant peptides (Mut) in the presence of autologous monocyte-derived dendritic cells for 20 h. CD69<sup>+</sup>4-1BB<sup>+</sup> populations within the CD4<sup>+</sup> T-cell gate (A) and CD69<sup>+</sup>4-1BB<sup>+</sup> populations within the CD8<sup>+</sup> T-cell gate (B) are shown.

**Table S1. HLA type, lymphocyte subsets, and activity of neutrophils and natural killer cells in the patient (related to Figure 1 and Figure 5).**

| Lymphocyte subset | % lymphocytes   | Activity of neutrophils, and natural killer cells | %       |         |
|-------------------|-----------------|---------------------------------------------------|---------|---------|
|                   | Day 276         |                                                   | Day 276 | Day 790 |
| CD3               | 92.6            | Neutrophil phagocytosis function                  | 44.9    | 40.8    |
| CD4               | 39.2            |                                                   |         |         |
| CD8               | 46.1            | Neutrophil sterilizing function                   | 99.8    | 99.9    |
| CD13              | 0.5             |                                                   |         |         |
| CD19              | 0.0             | Natural killer cell activity                      | 33.1    | 47.4    |
|                   |                 |                                                   |         |         |
| <b>HLA type</b>   |                 |                                                   |         |         |
|                   | <b>Allele 1</b> | <b>Allele 2</b>                                   |         |         |
| <b>A</b>          | 11:01:01        | 31:01:02                                          |         |         |
| <b>B</b>          | 15:01:01        | 48:01:01                                          |         |         |
| <b>C</b>          | 04:01:01        | –                                                 |         |         |
| <b>DRB1</b>       | 04:06:01        | 09:01:02                                          |         |         |
| <b>DRB345</b>     | 01:03:01        | –                                                 |         |         |
| <b>DQA1</b>       | 03:01:01        | –                                                 |         |         |
| <b>DQB1</b>       | 03:02:01        | 03:03:02                                          |         |         |
| <b>DPA1</b>       | 02:02:02        | –                                                 |         |         |
| <b>DPB1</b>       | 05:01:01        | –                                                 |         |         |

**Table S2. Results of the multiplex PCR testing of sputum samples for 19 respiratory tract infections (BioFire® FilmArray Respiratory Panel 2.1) (related to Figure 1).**

| <b>Viruses and Bacteria</b>                     | <b>Result</b> |
|-------------------------------------------------|---------------|
| <b>Adenovirus</b>                               | not detected  |
| <b>Coronavirus 229E</b>                         | not detected  |
| <b>Coronavirus HKU1</b>                         | not detected  |
| <b>Coronavirus NL63</b>                         | not detected  |
| <b>Coronavirus OC43</b>                         | not detected  |
| <b>SARS-CoV-2</b>                               | detected      |
| <b>Human Metapneumovirus</b>                    | not detected  |
| <b>Human Rhinovirus/Enterovirus</b>             | not detected  |
| <b>Influenza A</b>                              | not detected  |
| <b>Influenza B</b>                              | not detected  |
| <b>Parainfluenza Virus 1</b>                    | not detected  |
| <b>Parainfluenza Virus 2</b>                    | not detected  |
| <b>Parainfluenza Virus 3</b>                    | not detected  |
| <b>Parainfluenza Virus 4</b>                    | not detected  |
| <b>Respiratory Syncytial Virus</b>              | not detected  |
| <b><i>Bordetella parapertussis</i> (IS1001)</b> | not detected  |
| <b><i>Bordetella pertussis</i> (ptxP)</b>       | not detected  |
| <b><i>Chlamydia pneumoniae</i></b>              | not detected  |
| <b><i>Mycoplasma pneumoniae</i></b>             | not detected  |

**Table S3. Data from the blood test results obtained during the observation period, particularly data related to the severity of COVID-19 (related to Figure 1).**

| Days since first PCR(+)  | 0       | 1       | 3       | 7       | 21      | 35      | 63      | 92      | 140     | 175     | 181     | 209     | 216     | 224     | 230     | 235     |
|--------------------------|---------|---------|---------|---------|---------|---------|---------|---------|---------|---------|---------|---------|---------|---------|---------|---------|
| WBC( $\mu$ L)            | 8,680   | 8,620   | 6,830   | 6,790   | 9,050   | 8,580   | 7,360   | 10,740  | 9,420   | 9,340   | 8,850   | 9,930   | 9,530   | 8,090   | 9,090   | 8,170   |
| Lymph ( $\mu$ L)         | 930     | 1,030   | 1,340   | 2,170   | 1,340   | 1,170   | 1,320   | 1,180   | 890     | 650     | 1,120   | 960     | 1,040   | 1,150   | 1,140   | 1,450   |
| Hb (g/dL)                | 14.7    | 14.0    | 14.3    | 15.5    | 14.9    | 13.9    | 13.9    | 13.0    | 12.5    | 12.9    | 13.4    | 13.4    | 13.2    | 12.6    | 12.4    |         |
| Plt ( $\mu$ L)           | 127,000 | 151,000 | 170,000 | 198,000 | 130,000 | 131,000 | 128,000 | 165,000 | 197,000 | 171,000 | 185,000 | 219,000 | 195,000 | 173,000 | 208,000 | 154,000 |
| Alb (g/dL)               | ..      | 3.6     | 3.5     | 4.0     | 4.1     | 3.5     | ..      | 3.8     | ..      | 3.4     | 3.7     | 3.9     | 3.9     | 3.9     | 3.7     | 3.4     |
| ALT (IU/L)               | 20      | 17      | 14      | 27      | 22      | 25      | 25      | 35      | 18      | 13      | 14      | 16      | 18      | 14      | 15      | 11      |
| LDH (IU/L)               | 157     | 155     | 126     | 138     | 149     | 145     | 147     | 152     | 177     | 138     | 137     | 145     | 159     | 160     | 159     | 149     |
| CK (IU/L)                | 30      | 32      | 23      | 24      | 30      | 25      | 28      | 24      | 21      | 19      | 20      | 22      | 22      | 23      | 23      | 18      |
| Cre (mg/dL)              | 0.55    | 0.56    | 0.58    | 0.65    | 0.58    | 0.61    | 0.62    | 0.49    | 0.47    | 0.42    | 0.47    | 0.50    | 0.48    | 0.50    | 0.52    | 0.54    |
| Troponin (pg/mL)         | ..      | ..      | ..      | ..      | ..      | ..      | ..      | ..      | ..      | ..      | ..      | ..      | ..      | ..      | <0.003  | ..      |
| PT (s)                   | ..      | 11.2    | 11.4    | 11.1    | 11.4    | 10.9    | ..      | ..      | ..      | 12.1    | ..      | ..      | 11.6    | 11.4    | ..      | 12.0    |
| D-dimer ( $\mu$ g/mL)    | ..      | 0.6     | 0.6     | 0.5     | 0.5     | ..      | ..      | ..      | ..      | ..      | ..      | ..      | ..      | ..      | <0.5    | ..      |
| CRP (mg/dL)              | 2.37    | 1.95    | 1.77    | 1.55    | 2.71    | 3.06    | 4.15    | 3.61    | 3.38    | 5.06    | 3.69    | 3.67    | 4.85    | 5.08    | 4.73    | 7.01    |
| Ferritin ( $\mu$ g/L)    | 135     | 251     | 258     | 247     | 141     | 319     | 346     | ..      | 254     | 221     | 208     | 183     | 164     | 163     | 156     | ..      |
| IL-6 (pg/mL)             | ..      | ..      | ..      | ..      | ..      | ..      | ..      | ..      | ..      | ..      | ..      | 21.9    | 21.5    | 18.9    | 17.3    | ..      |
| Procalcitonin (ng/mL)    | ..      | 0.06    | ..      | ..      | ..      | ..      | ..      | ..      | ..      | 0.06    | ..      | ..      | ..      | 0.03    | ..      | 0.06    |
| KL-6 (IU/mL)             | ..      | 185     | 188     | 225     | 236     | ..      | ..      | ..      | ..      | 430     | ..      | ..      | ..      | 522     | ..      | ..      |
| IgG (mg/dL) <sup>a</sup> | 964     | 2,183   | ..      | ..      | 1,137   | 1,349   | 1,192   | ..      | 954     | 1,695   | 1,425   | 1,478   | 1,248   | 978     | 1,899   | ..      |

| Days since first PCR(+)  | 237     | 238     | 239     | 240     | 241     | 242     | 243     | 244     | 246     | 248     | 252     | 258     | 265     | 276     | 308     | 336     |
|--------------------------|---------|---------|---------|---------|---------|---------|---------|---------|---------|---------|---------|---------|---------|---------|---------|---------|
| WBC( $\mu$ L)            | 8,720   | 7,400   | 6,420   | 3,940   | 2,860   | 3,800   | 5,010   | 5,430   | 6,670   | 6,560   | 13,580  | 9,300   | 7,680   | 9,180   | 5,650   | 4,990   |
| Lymph ( $\mu$ L)         | 920     | 1,030   | 920     | 1,080   | 1,290   | 1,240   | 1,060   | 1,860   | 2,160   | 1,770   | 2,340   | 1,570   | 1,660   | 1,520   | 1,040   | 1,220   |
| Hb (g/dL)                | 12.2    | 12.0    | 11.6    | 11.2    | 11.6    | 11.3    | 11.2    | 11.5    | 12.0    | 12.4    | 12.0    | 11.5    | 11.5    | 10.9    | 10.6    | 10.4    |
| Plt ( $\mu$ L)           | 151,000 | 147,000 | 157,000 | 162,000 | 144,000 | 161,000 | 168,000 | 175,000 | 204,000 | 209,000 | 211,000 | 152,000 | 145,000 | 185,000 | 134,000 | 134,000 |
| Alb (g/dL)               | 3.5     | 3.6     | 3.4     | 3.3     | 3.4     | 3.3     | 3.2     | 3.4     | 3.5     | 3.8     | 3.9     | 4.1     | 4.4     | 4.5     | 4.6     | 4.8     |
| ALT (IU/L)               | 11      | 12      | 14      | 13      | 14      | 25      | 47      | 50      | 62      | 63      | 39      | 52      | 35      | 27      | 17      | 17      |
| LDH (IU/L)               | 157     | 164     | 179     | 164     | 158     | 167     | 179     | 162     | 166     | 161     | 233     | 151     | 156     | 164     | 141     | 163     |
| CK (IU/L)                | 20      | 19      | 17      | 18      | 18      | 18      | 22      | 23      | 24      | 24      | 41      | 50      | 95      | 79      | 56      | 70      |
| Cre (mg/dL)              | 0.51    | 0.48    | 0.49    | 0.48    | 0.48    | 0.44    | 0.49    | 0.44    | 0.48    | 0.53    | 0.60    | 0.59    | 0.55    | 0.54    | 0.68    | 0.69    |
| Troponin (pg/mL)         | ..      | 0.003   | ..      | ..      | ..      | ..      | ..      | ..      | 0.003   | ..      | ..      | ..      | ..      | ..      | ..      | ..      |
| PT (s)                   | ..      | 11.7    | 11.6    | 11.9    | 12.1    | 12.5    | 12.5    | 12.5    | 12.4    | 12.2    | 11.3    | 11.0    | 11.2    | 11.3    | 11.7    | 11.3    |
| D-dimer ( $\mu$ g/mL)    | ..      | 0.5     | 0.5     | <0.5    | 0.5     | 0.5     | <0.5    | <0.5    | <0.5    | <0.5    | <0.5    | <0.5    | <0.5    | <0.5    | <0.5    | ..      |
| CRP (mg/dL)              | 7.49    | 7.01    | 7.25    | 5.88    | 2.70    | 1.29    | 0.64    | 0.48    | 0.25    | 0.33    | 0.34    | 0.27    | 0.13    | 0.16    | 0.06    | 0.09    |
| Ferritin ( $\mu$ g/L)    | 193     | 207     | 204     | 208     | 237     | 212     | 191     | 169     | 133     | 96      | 57      | 32      | 17      | 11      | 6       | 9       |
| IL-6 (pg/mL)             | ..      | 20.8    | 31.5    | 9.1     | 4.9     | 6.2     | 6.0     | 2.0     | 3.9     | 3.3     | 4.1     | 3.8     | 1.8     | 2.3     | <1.5    | 1.9     |
| Procalcitonin (ng/mL)    | ..      | 0.05    | ..      | ..      | ..      | ..      | ..      | ..      | 0.05    | ..      | ..      | ..      | ..      | 0.06    | ..      | ..      |
| KL-6 (IU/mL)             | ..      | 510     | 476     | 480     | 516     | 508     | 516     | 550     | 567     | 594     | 494     | 398     | 358     | 266     | 170     | 156     |
| IgG (mg/dL) <sup>a</sup> | 1,371   | 1,372   | 1,229   | 1,199   | 1,227   | 1,141   | 1,148   | 1,131   | 1,108   | 1,134   | 1,021   | 1,909   | 1,557   | 1,146   | 1,150   | 1,197   |

The green shaded area indicates remdesivir administration.

<sup>a</sup>The patient received regular intravenous immunoglobulin transfusions.

**Table S4. Detection of infectious viruses and viral RNA in clinical specimens (related to Figure 2).**

| Sample                                             | Collection day | Virus titers (FFUs/mL) | Virus isolation | qRT-PCR (Ct value) | Viral RNA (copies/ $\mu$ L) |
|----------------------------------------------------|----------------|------------------------|-----------------|--------------------|-----------------------------|
| Saliva                                             | Day 0          | not done               | not done        | 31.9               | 2.6E+01                     |
| Nasopharyngeal swab                                | Day 1          | not done               | not done        | 21.3               | 1.1E+05                     |
| <u>Nasopharyngeal swab</u> <sup>a</sup>            | Day 1          | 2,160                  | +               | 23.0               | 4.4E+04                     |
| Saliva                                             | Day 63         | not done               | not done        | 34.7               | 3.3E+00                     |
| Saliva                                             | Day 77         | not done               | not done        | 33.8               | 6.4E+00                     |
| Saliva                                             | Day 77         | <5                     | –               | –                  | NA <sup>b</sup>             |
| Saliva                                             | Day 92         | not done               | not done        | –                  | NA                          |
| Saliva                                             | Day 92         | not done               | not done        | –                  | NA                          |
| Sputum                                             | Day 175        | not done               | not done        | 35.9               | 1.0E+01                     |
| <u>Sputum</u>                                      | Day 175        | not done               | –               | 38.8               | 6.5E–01                     |
| Sputum                                             | Day 176        | not done               | not done        | 36.5               | 8.7E+00                     |
| <u>Sputum</u>                                      | Day 176        | not done               | –               | 37.0               | 2.2E+00                     |
| Sputum                                             | Day 181        | not done               | not done        | 35.3               | 3.9E+01                     |
| <u>Sputum</u>                                      | Day 196        | <2.5                   | –               | 37.6               | 1.8E+00                     |
| <u>Sputum</u>                                      | Day 204        | <2.5                   | –               | not done           | NA                          |
| <u>Sputum</u>                                      | Day 209        | <2.5                   | –               | 31.2               | 1.1E+00                     |
| <u>Bronchoalveolar lavage fluid–1</u>              | Day 218        | 10                     | +               | –                  | NA                          |
| <u>Bronchoalveolar lavage fluid–2</u>              | Day 218        | 15                     | +               | 31.5               | 9.1E+01                     |
| <u>Bronchoalveolar lavage fluid–3</u> <sup>a</sup> | Day 218        | 17.5                   | +               | 32.1               | 6.2E+01                     |
| <u>Lung tissue (by biopsy)</u> <sup>a</sup>        | Day 218        | 15                     | +               | not done           | NA                          |
| <u>Suction phlegm</u>                              | Day 218        | <2.5                   | –               | 35.6               | 6.5E+00                     |
| <u>Sputum</u> <sup>a</sup>                         | Day 224        | 5                      | +               | 35.0               | 9.6E+00                     |
| Saliva                                             | Day 224        | <5                     | –               | 39.8               | 4.3E–01                     |
| Nasopharyngeal swab                                | Day 237        | not done               | –               | –                  | NA                          |
| <u>Sputum</u>                                      | Day 237        | not done               | –               | 37.0               | 3.0E+00                     |
| Sputum                                             | Day 238        | not done               | –               | 34.4               | 1.8E+01                     |
| Urine                                              | Day 238        | not done               | –               | –                  | NA                          |
| Whole blood                                        | Day 238        | not done               | –               | –                  | NA                          |
| Sputum–1                                           | Day 239        | 10                     | +               | 31.0               | 1.9E+02                     |
| Sputum–2 <sup>a</sup>                              | Day 239        | 130                    | +               | 33.4               | 3.6E+01                     |
| Sputum                                             | Day 240        | <5                     | –               | –                  | NA                          |
| Sputum                                             | Day 241        | <5                     | –               | 43.7               | 2.9E–02                     |
| Sputum–1                                           | Day 242        | <5                     | –               | 42.0               | 9.5E–02                     |
| Sputum–2                                           | Day 242        | <5                     | –               | –                  | NA                          |
| Sputum                                             | Day 243        | <5                     | –               | –                  | NA                          |
| Sputum                                             | Day 244        | <5                     | –               | –                  | NA                          |
| Sputum                                             | Day 245        | <5                     | –               | –                  | NA                          |
| Sputum                                             | Day 246        | <5                     | –               | –                  | NA                          |
| Sputum                                             | Day 247        | <5                     | –               | –                  | NA                          |
| Sputum                                             | Day 248        | <5                     | –               | –                  | NA                          |
| Sputum                                             | Day 251        | <5                     | –               | –                  | NA                          |
| Sputum                                             | Day 252        | <5                     | –               | –                  | NA                          |
| Sputum                                             | Day 253        | <5                     | –               | –                  | NA                          |
| Sputum                                             | Day 255        | <5                     | –               | –                  | NA                          |
| Nasopharyngeal swab                                | Day 255        | <5                     | –               | –                  | NA                          |
| Sputum                                             | Day 258        | <5                     | –               | –                  | NA                          |
| Nasopharyngeal swab                                | Day 258        | <5                     | –               | –                  | NA                          |
| Sputum                                             | Day 260        | <5                     | –               | –                  | NA                          |
| Sputum                                             | Day 262        | <5                     | –               | –                  | NA                          |
| Sputum                                             | Day 265        | <5                     | –               | –                  | NA                          |
| Sputum                                             | Day 267        | <5                     | –               | –                  | NA                          |
| Sputum                                             | Day 269        | <5                     | –               | –                  | NA                          |
| Sputum                                             | Day 273        | <5                     | –               | –                  | NA                          |
| Sputum                                             | Day 276        | <5                     | –               | –                  | NA                          |
| Sputum                                             | Day 308        | not done               | –               | –                  | NA                          |

The underlined samples were stored at –80°C and tested retrospectively.

<sup>a</sup>Samples tested for the viral genome analysis.

<sup>b</sup>Not applicable.

**Table S5. List of intravenous immunoglobulin (IVIG) products administered to the patient (related to Figure 1).**

| Day  | Product                                            | Company                           | Period of blood collection     | Dosage (g) |
|------|----------------------------------------------------|-----------------------------------|--------------------------------|------------|
| -112 | GAMMAGARD Solvent/Detergent Treated Intravenous 5g | Baxalta US Inc.                   | -2019 May                      | 40         |
|      | Venoglobulin IH 10% I.V.10g/100mL                  | Japan Blood Products Organization | 2017 Oct                       | 10         |
| -84  | GAMMAGARD Solvent/Detergent Treated Intravenous 5g | Baxalta US Inc.                   | -2019 May                      | 40         |
|      | Venoglobulin IH 10% I.V.10g/100mL                  | Japan Blood Products Organization | 2018 Jan                       | 10         |
| -56  | GAMMAGARD Solvent/Detergent Treated Intravenous 5g | Baxalta US Inc.                   | -2019 Aug                      | 40         |
|      | Venoglobulin IH 10% I.V.10g/100mL                  | Japan Blood Products Organization | 2018 Jan                       | 10         |
| -28  | GAMMAGARD Solvent/Detergent Treated Intravenous 5g | Baxalta US Inc.                   | -2019 Aug                      | 40         |
|      | Venoglobulin IH 10% I.V.10g/100mL                  | Japan Blood Products Organization | 2018 Jan                       | 10         |
| 0    | GAMMAGARD Solvent/Detergent Treated Intravenous 5g | Baxalta US Inc.                   | -2019 Aug                      | 40         |
|      | Venoglobulin IH 10% I.V.10g/100mL                  | Japan Blood Products Organization | 2018 Jan                       | 10         |
| 21   | GAMMAGARD Solvent/Detergent Treated Intravenous 5g | Baxalta US Inc.                   | -2019 Aug                      | 50         |
|      | Venoglobulin IH 10% I.V.10g/100mL                  | Japan Blood Products Organization | 2018 Jun                       | 10         |
| 42   | GAMMAGARD Solvent/Detergent Treated Intravenous 5g | Baxalta US Inc.                   | -2019 Aug                      | 50         |
|      | Venoglobulin IH 10% I.V.10g/100mL                  | Japan Blood Products Organization | 2018 Jun                       | 10         |
| 63   | GAMMAGARD Solvent/Detergent Treated Intravenous 5g | Baxalta US Inc.                   | -2019 Aug                      | 50         |
|      | Venoglobulin IH 10% I.V.10g/100mL                  | Japan Blood Products Organization | 2018 Jun                       | 10         |
|      | Venoglobulin IH 10% I.V.5g/50mL                    | Japan Blood Products Organization | 2018 Aug                       | 10         |
| 84   | Privigen 10% I.V.Drip Infusion 10g/100mL           | CSL Behring                       | 2018 Apr-2019 Mar              | 60         |
| 112  | Privigen 10% I.V.Drip Infusion 10g/100mL           | CSL Behring                       | 2018 Sep-2019 May <sup>a</sup> | 70         |
| 140  | Privigen 10% I.V.Drip Infusion 10g/100mL           | CSL Behring                       | 2018 Sep-2019 May <sup>a</sup> | 70         |
| 168  | Privigen 10% I.V.Drip Infusion 10g/100mL           | CSL Behring                       | 2018 Sep-2019 May <sup>a</sup> | 70         |
| 196  | Privigen 10% I.V.Drip Infusion 10g/100mL           | CSL Behring                       | 2018 Sep-2019 May <sup>a</sup> | 70         |
| 224  | Privigen 10% I.V.Drip Infusion 10g/100mL           | CSL Behring                       | 2018 Sep-2019 May <sup>a</sup> | 70         |
| 262  | Privigen 10% I.V.Drip Infusion 10g/100mL           | CSL Behring                       | 2018 Sep-2019 May <sup>a</sup> | 70         |
| 280  | Privigen 10% I.V.Drip Infusion 10g/100mL           | CSL Behring                       | 2018 Sep-2019 May <sup>a</sup> | 70         |
| 308  | Privigen 10% I.V.Drip Infusion 10g/100mL           | CSL Behring                       | 2018 Sep-2019 May <sup>a</sup> | 70         |
| 336  | Privigen 10% I.V.Drip Infusion 10g/100mL           | CSL Behring                       | 2018 Sep-2019 May <sup>a</sup> | 70         |
| 364  | Privigen 10% I.V.Drip Infusion 10g/100mL           | CSL Behring                       | 2018 Sep-2019 May <sup>a</sup> | 70         |
| 392  | Privigen 10% I.V.Drip Infusion 10g/100mL           | CSL Behring                       | 2018 Sep-2019 May <sup>a</sup> | 70         |
| 420  | Privigen 10% I.V.Drip Infusion 10g/100mL           | CSL Behring                       | 2018 Sep-2019 May <sup>a</sup> | 70         |
| 448  | Privigen 10% I.V.Drip Infusion 10g/100mL           | CSL Behring                       | 2019 Apr-2019 Jul <sup>b</sup> | 70         |

<sup>a</sup>IVIG 2020Lot A was tested for anti-SARS-CoV-2 spike protein antibodies using ELISA (Figure S1).

<sup>b</sup>IVIG 2020Lot B was tested for anti-SARS-CoV-2 spike protein antibodies using ELISA (Figure S1).



**Table S6. List of viruses used in the phylogenetic analysis (related to Figure 2 and the STAR Methods).**

|                              | Accession ID    |          | Virus name                           | Pango lineage | Clade |
|------------------------------|-----------------|----------|--------------------------------------|---------------|-------|
|                              | GISAD           | NCBI     |                                      |               |       |
| Day_218_BALF                 | EPI_ISL_4935777 | ..       | hCoV-19/Japan/RIMD-DVI-C10B/2021     | B.1.1.284     | GR    |
| Day_218_Lung                 | EPI_ISL_4935949 | ..       | hCoV-19/Japan/RIMD-DVI-C10L/2021     | B.1.1.284     | GR    |
| Day_224_Sputum               | EPI_ISL_4936095 | ..       | hCoV-19/Japan/RIMD-DVI-C16/2021      | B.1.1.284     | GR    |
| Day_1_NPS                    | EPI_ISL_4936243 | ..       | hCoV-19/Japan/RIMD-DVI-H06/2020      | B.1.1.284     | GR    |
| Day_239_Sputum               | EPI_ISL_4936533 | ..       | hCoV-19/Japan/RIMD-DVI-C31/2021      | B.1.1.284     | GR    |
| OCGH_P2_2021                 | EPI_ISL_4929525 | ..       | hCoV-19/Japan/RIMD-DVI-C26H/2021     | R.1           | ..    |
| OCGH_P3_2021                 | EPI_ISL_4930839 | ..       | hCoV-19/Japan/RIMD-DVI-C26W/2021     | R.1           | ..    |
| OCGH_P4_2021                 | EPI_ISL_4931056 | ..       | hCoV-19/Japan/RIMD-DVI-D09/2021      | B.1.1.7       | GRY   |
| OCGH_P6_2021                 | EPI_ISL_4931846 | ..       | hCoV-19/Japan/RIMD-DVI-D21/2021      | B.1.1.7       | GRY   |
| OIPH_1_2020                  | EPI_ISL_4932136 | ..       | hCoV-19/Japan/OIPH14/2020            | A             | S     |
| OIPH_2_2020                  | EPI_ISL_4932550 | ..       | hCoV-19/Japan/OIPH16/2020            | B.1.1.284     | GR    |
| OIPH_3_2020                  | EPI_ISL_4932712 | ..       | hCoV-19/Japan/OIPH21/2020            | B.1.1.284     | GR    |
| OIPH_24_2020                 | EPI_ISL_4932860 | ..       | hCoV-19/Japan/OIPH29/2020            | B.1.1.284     | GR    |
| OIPH_35_2020                 | EPI_ISL_4933015 | ..       | hCoV-19/Japan/OIPH34/2020            | B.1.1.284     | GR    |
| OIPH_43_2020                 | EPI_ISL_4933271 | ..       | hCoV-19/Japan/OIPH6/2020             | B.1.1.285     | GR    |
| OIPH_71_2020                 | EPI_ISL_4933542 | ..       | hCoV-19/Japan/OIPH51/2020            | B.1.1.284     | GR    |
| OIPH_76_2020                 | EPI_ISL_4933741 | ..       | hCoV-19/Japan/OIPH54/2020            | B.1.1.284     | GR    |
| OIPH_92_2020                 | EPI_ISL_4933859 | ..       | hCoV-19/Japan/OIPH61/2020            | B.1.1.284     | GR    |
| OIPH_123_2021                | EPI_ISL_4933990 | ..       | hCoV-19/Japan/OIPH1/2021             | B.1.1.28      | ..    |
| OIPH11_2020                  | EPI_ISL_4934247 | ..       | hCoV-19/Japan/OIPH25/2020            | B.1.1.284     | GR    |
| OIPH19_2020                  | EPI_ISL_4934751 | ..       | hCoV-19/Japan/OIPH28/2020            | B.1.1.284     | GR    |
| OIPH127_2021                 | EPI_ISL_4934873 | ..       | hCoV-19/Japan/OIPH5/2021             | B.1.1.214     | GR    |
| OIPH128_2021                 | EPI_ISL_4934996 | ..       | hCoV-19/Japan/OIPH6/2021             | B.1.1.214     | GR    |
| OIPH133_2021                 | EPI_ISL_4935185 | ..       | hCoV-19/Japan/OIPH10/2021            | B.1.1.214     | GR    |
| OIPH135_2021                 | EPI_ISL_4935429 | ..       | hCoV-19/Japan/OIPH12/2021            | B.1.1.214     | GR    |
| Japan_TKYE626993_2020        | .. <sup>a</sup> | LC606017 | hCoV-19/Japan/TKYE626993/2020        | B.1.1.284     | GR    |
| Japan_TKYET29933_2020        | EPI_ISL_649137  | LC593812 | hCoV-19/Japan/TKYET29933/2020        | B.1.1.284     | GR    |
| Japan_TKYE618937_2020        | .. <sup>a</sup> | LC573279 | hCoV-19/Japan/TKYE618937/2020        | ..            | ..    |
| Japan_TKYT22395_2020         | EPI_ISL_649132  | LC593807 | hCoV-19/Japan/TKYT22395/2020         | B.1.1.284     | GR    |
| Japan_TKYE630074_2020        | EPI_ISL_649138  | LC593813 | hCoV-19/Japan/TKYE630074/2020        | B.1.1.284     | GR    |
| Japan_TKYE624705_2020        | EPI_ISL_649135  | LC593810 | hCoV-19/Japan/TKYE624705/2020        | B.1.1.284     | GR    |
| Japan_TK-Y17873_2020         | EPI_ISL_486909  | LC567857 | hCoV-19/Japan/TK-Y17873/2020         | B.1.1.284     | GR    |
| Japan_TKYE618779_2020        | ..              | LC573283 | hCoV-19/Japan/TKYE618779/2020        | ..            | ..    |
| Japan_TKYE627000_2020        | EPI_ISL_649136  | LC593811 | hCoV-19/Japan/TKYE627000/2020        | B.1.1.284     | GR    |
| Japan_TKYE618749_2020        | ..              | LC573282 | hCoV-19/Japan/TKYE618749/2020        | ..            | ..    |
| Japan_TKYT22355_2020         | EPI_ISL_649127  | LC593802 | hCoV-19/Japan/TKYT22355/2020         | B.1.1.284     | GR    |
| Japan_TKYT22342_2020         | EPI_ISL_649126  | LC593801 | hCoV-19/Japan/TKYT22342/2020         | B.1.1.284     | GR    |
| Japan_TKYE618930_2020        | ..              | LC573278 | hCoV-19/Japan/TKYE618930/2020        | ..            | ..    |
| Japan_TKYE630094_2020        | EPI_ISL_649139  | LC593814 | hCoV-19/Japan/TKYE630094/2020        | B.1.1.284     | GR    |
| Japan_TKYT30095_2020         | EPI_ISL_649140  | LC593815 | hCoV-19/Japan/TKYT30095/2020         | B.1.1.284     | GR    |
| Japan_TKYE618928_2020        | ..              | LC573276 | hCoV-19/Japan/TKYE618928/2020        | ..            | ..    |
| Japan_TKYE618929_2020        | ..              | LC573277 | hCoV-19/Japan/TKYE618929/2020        | ..            | ..    |
| England_MILK-9E05B3_2020     | EPI_ISL_601443  | ..       | hCoV-19/England/MILK-9E05B3/2020     | B.1.1.7       | GRY   |
| England_20168037604_2020     | EPI_ISL_466615  | ..       | hCoV-19/England/20168037604/2020     | B.1.1         | GR    |
| Spain_CT-ISCIII-2013597_2020 | EPI_ISL_539548  | ..       | hCoV-19/Spain/CT-ISCIII-2013597/2020 | B.1.177       | GV    |
| Canada_ON-PHL-8751_2020      | EPI_ISL_418345  | ..       | hCoV-19/Canada/ON-PHL-8751/2020      | B.1           | GH    |
| Germany_BY-ChVir-929_2020    | EPI_ISL_406862  | ..       | hCoV-19/Germany/BY-ChVir-929/2020    | B.1.153       | G     |
| Wuhan_WIV04_2019             | EPI_ISL_402124  | MN996528 | hCoV-19/Wuhan/WIV04/2019             | B             | L     |
| Italy_LAZ-INMI-SPL1_2020     | EPI_ISL_412974  | ..       | hCoV-19/Italy/LAZ-INMI-SPL1/2020     | B             | V     |
| Guangdong_20SF012_2020       | EPI_ISL_403932  | ..       | hCoV-19/Guangdong/20SF012/2020       | A             | S     |

<sup>a</sup>Not applicable.

**Table S7. SARS-CoV-2 mutations observed in the patient (related to Figure 2).**

| Nucleotide position | ORF           | Day 1 reference | Allele | Amino acid substitution | Protein      | Amino acid position in protein | Samples with mutation   | Frequency in Cov-Glue data base <sup>g</sup> |
|---------------------|---------------|-----------------|--------|-------------------------|--------------|--------------------------------|-------------------------|----------------------------------------------|
| 6617                | <i>ORF1ab</i> | G               | T      | G2118C                  | NSP3         | G1300C                         | A <sup>b</sup>          | 102                                          |
| 7814                | <i>ORF1ab</i> | T               | C      | S2517P                  | NSP3         | S1699P                         | 224 <sup>c</sup>        | 80                                           |
| 9202                | <i>ORF1ab</i> | T               | A      | F2979L                  | NSP4         | F216L                          | 224                     | 19                                           |
| 9316                | <i>ORF1ab</i> | T               | C      | V3017V                  | NSP4         | – <sup>a</sup>                 | A                       |                                              |
| 9474                | <i>ORF1ab</i> | C               | T      | A3070V                  | NSP4         | A307V                          | A                       | 828                                          |
| 10323               | <i>ORF1ab</i> | A               | G      | K3353R                  | NSP5         | K90R                           | A                       | 19588                                        |
| 11266               | <i>ORF1ab</i> | G               | A      | L3667L                  | NSP6         | –                              | 224                     |                                              |
| 11388               | <i>ORF1ab</i> | T               | C      | V3708A                  | NSP6         | V139A                          | 239 <sup>d</sup>        | 4                                            |
| 11750               | <i>ORF1ab</i> | C               | T      | L3829F                  | NSP6         | L260F                          | A                       | 5,611                                        |
| 15654               | <i>ORF1ab</i> | C               | T      | D5130D                  |              | –                              | 218L <sup>e</sup>       |                                              |
| 16993               | <i>ORF1ab</i> | T               | C      | Y5577H                  | NSP13        | Y253H                          | 224                     | 545                                          |
| 19906               | <i>ORF1ab</i> | A               | G      | I6548V                  | NSP15        | I96V                           | 218B <sup>f</sup> , 239 | 19                                           |
| 20421               | <i>ORF1ab</i> | T               | G      | D6719E                  | NSP15        | D267E                          | A                       | 148                                          |
| 21132               | <i>ORF1ab</i> | A               | G      | Q6956Q                  |              | –                              | 218L                    |                                              |
| 21637               | <i>S</i>      | C               | T      | P25P                    | <i>S</i>     | –                              | 218L                    |                                              |
| 22987               | <i>S</i>      | C               | T      | A475A                   | <i>S</i>     | –                              | A                       |                                              |
| 25008               | <i>S</i>      | A               | C      | K1149T                  | <i>S</i>     | K1149T                         | A                       | 0                                            |
| 25313               | <i>S</i>      | G               | A      | G1251R                  | <i>S</i>     | G1251R                         | 218B, 239               | 51                                           |
| 25487               | <i>ORF3a</i>  | C               | T      | T32I                    | <i>ORF3a</i> | T32I                           | 239                     | 1115                                         |
| 26270               | <i>E</i>      | C               | T      | T9I                     | <i>E</i>     | T9I                            | 239                     | 1448                                         |
| 26333               | <i>E</i>      | C               | T      | T30I                    | <i>E</i>     | T30I                           | 218L                    | 298                                          |
| 26369               | <i>E</i>      | A               | G      | Y42C                    | <i>E</i>     | Y42C                           | A                       | 5                                            |
| 26550               | <i>M</i>      | G               | T      | V10F                    | <i>M</i>     | V10F                           | A                       | 9                                            |
| 26895               | <i>M</i>      | C               | T      | H125Y                   | <i>M</i>     | H125Y                          | A                       | 2030                                         |
| 27696               | <i>ORF7a</i>  | T               | C      | F101F                   | <i>ORF7a</i> | –                              | 218B, 239               |                                              |
| 27737               | <i>ORF7a</i>  | C               | T      | T115I                   | <i>ORF7a</i> | T115I                          | A                       | 507                                          |
| 27752               | <i>ORF7a</i>  | C               | T      | T120I                   | <i>ORF7a</i> | T120I                          | A                       | 2335                                         |

<sup>a</sup>Synonymous substitution.

<sup>b</sup>All four virus isolates.

<sup>c</sup>224, virus isolated from sputum on day 224.

<sup>d</sup>239, virus isolated from sputum on day 239.

<sup>e</sup>218L, virus isolated from lung tissue on day 218.

<sup>f</sup>218B, virus isolated from bronchoalveolar lavage fluid on day 218.

<sup>g</sup>Accessed on Sept 13, 2021. In the database, 867,980 sequences with D614G and 257,333 sequences with N501Y were found.

**Table S8. List of peptides used to stimulate T cells (related to Figure 3, 4, and 5).**

| Peptide name       | Sequence                 |                                                                        |
|--------------------|--------------------------|------------------------------------------------------------------------|
|                    | Wuhan                    | Mutant                                                                 |
| <b>E1</b>          | MYSFVSEETGLIVN           | MYSFVSEE <u>I</u> GLIVN                                                |
| <b>E29</b>         | VTLAILTALRLCAYC          | V <u>I</u> LAILTALRLCAYC                                               |
| <b>E37</b>         | LRLCAYCCNIVNVSL          | LRLC <u>A</u> CCNIVNVSL                                                |
| <b>M1</b>          | MADSNGTITVEELKK          | MADSNGTIT <u>E</u> EELKK                                               |
| <b>M121</b>        | NVPLHGTILTRP <u>L</u> LE | NVPLY <u>G</u> TILTRP <u>L</u> LE                                      |
| <b>ORF1ab 2109</b> | KPNELSRVLGLKTLA          | KPNELSRVL <u>Q</u> LKTLA                                               |
| <b>ORF1ab 2509</b> | GQKTYERHSLSHFVN          | GQKTYERH <u>P</u> LSHFVN                                               |
| <b>ORF1ab 2973</b> | VRVVTTFDSEYCRHG          | VRVVT <u>T</u> DSEYCRHG                                                |
| <b>ORF1ab 3061</b> | AYYFMRFRRAFGEYS          | AYYFMRFR <u>R</u> VFGEYS                                               |
| <b>ORF1ab 3349</b> | VLKLVDTANPKTPK           | VLK <u>L</u> RVDANPKTPK                                                |
| <b>ORF1ab 3705</b> | ARRVWTLMNVLTLVY          | ARR <u>A</u> WTLMNVLTLVY                                               |
| <b>ORF1ab 3821</b> | RYMNSQGLLPKNSI           | RYMNSQGL <u>F</u> PKNSI                                                |
| <b>ORF1ab 5565</b> | VPQEHYVRITGLYPT          | VPQEHYVRITGL <u>H</u> PT                                               |
| <b>ORF1ab 6541</b> | KRDAPAHISTIGVCS          | KRDAPAH <u>V</u> STIGVCS                                               |
| <b>ORF1ab 6713</b> | SPFELED <u>F</u> IPMDSTV | SPFELE <u>E</u> FIPMDSTV                                               |
| <b>ORF3a 25</b>    | PSDFVRATATIPIQA          | PSDFVRA <u>I</u> ATIPIQA                                               |
| <b>ORF7a 105</b>   | AAIVFITLCFTLKRKTE        | AAIVFITLCF <u>I</u> LKRKTE (T115I)<br>AAIVFITLCFTLKRK <u>E</u> (T120I) |
| <b>S1145</b>       | LDSFKEELD <u>K</u> YFKNH | LDSF <u>I</u> EELD <u>K</u> YFKNH                                      |
| <b>S1245</b>       | KGCCSCGSCCKFDED          | KGCCSC <u>R</u> SCCKFDED                                               |

Underlined amino acid sequences in the mutant peptides indicate the amino acids that differed from those in the Wuhan peptides.

**Table S9. V(D)J usages of clone-111 (related to Figure 4 and 5).**

| <b>Clone ID</b> | <b>TRAV</b> | <b>CDR3a</b>     | <b>TRAJ</b> | <b>TRBV</b> | <b>CDR3b</b>  | <b>TRBJ</b> |
|-----------------|-------------|------------------|-------------|-------------|---------------|-------------|
| 111             | 13-2        | CAENPRFSGGYNKLIF | 4           | 6-1         | CASSGTGVDTQYF | 2-3         |
